# Supplementary material
Source: PubMed Central journal article supplement (PMC8938263)
Supplement: 41591_2021_1676_MOESM1_ESM.pdf [file 41591_2021_1676_MOESM1_ESM.pdf]

---

**Supplementary information**

---

**mRNA booster immunization elicits potent neutralizing serum activity against the SARS-CoV-2 Omicron variant**

---

In the format provided by the authors and unedited

**Supplementary Table 1. Study participant demographics.**

**a**

| <b>Vaccinated cohort</b>                                              |                             |
|-----------------------------------------------------------------------|-----------------------------|
| <b>Participants - <i>n</i></b>                                        | 30                          |
| <b>Gender</b>                                                         |                             |
| Male - <i>n</i> (%)                                                   | 13 (43%)                    |
| Female - <i>n</i> (%)                                                 | 17 (57%)                    |
| <b>Age - median years (range)</b>                                     | 49 (27-78)                  |
| <b>Reported comorbidities</b>                                         |                             |
| Cardiovascular disease - <i>n</i> (%)                                 | 10 (33.3%)                  |
| Respiratory disease - <i>n</i> (%)                                    | 4 (13.3%)                   |
| Rheumatoid arthritis - <i>n</i> (%)                                   | 2 (6.6%)                    |
| Diabetes - <i>n</i> (%)                                               | 1 (3.3%)                    |
| Polymyalgia rheumatica - <i>n</i> (%)                                 | 1 (3.3%)                    |
| Autoimmune hepatitis - <i>n</i> (%)                                   | 1 (3.3%)                    |
| <b>Body mass index - median (IQR, range) *</b>                        | 26.0 (24.2-29.6; 18.8-37.2) |
| <b>Vaccination received</b>                                           | BNT162b2                    |
| <b>Sampling time point - median weeks (IQR; range)</b>                |                             |
| Early (after second dose)                                             | 3.9 (3.7-4.2; 2.9-6.0)      |
| Late (after second dose)                                              | 21.0 (20.3-22.9; 18.7-31.1) |
| Booster (after second dose)                                           | 40.6 (36.8-41.8; 29.7-44.0) |
| <b>Time between second and third dose - median weeks (IQR; range)</b> | 36.6 (32.2-38.5; 26.9-40.9) |

\* available for 29 participants.

**b**

| <b>Convalescent cohort</b>                                                |                             |
|---------------------------------------------------------------------------|-----------------------------|
| <b>Participants - <i>n</i></b>                                            | 30                          |
| <b>Gender</b>                                                             |                             |
| Male - <i>n</i> (%)                                                       | 14 (47%)                    |
| Female - <i>n</i> (%)                                                     | 16 (53%)                    |
| <b>Age - median years (range)</b>                                         | 52 (22-68)                  |
| <b>Reported comorbidities</b>                                             |                             |
| Arterial hypertension - <i>n</i> (%)                                      | 3 (10%)                     |
| Tumor - <i>n</i> (%)                                                      | 3 (10%)                     |
| Asthma - <i>n</i> (%)                                                     | 3 (10%)                     |
| Diabetes - <i>n</i> (%)                                                   | 1 (3.3%)                    |
| Multiple sclerosis - <i>n</i> (%)                                         | 1 (3.3%)                    |
| Coagulation disorder - <i>n</i> (%)                                       | 1 (3.3%)                    |
| <b>Time period of SARS-CoV-2 infection</b>                                | February - March 2020       |
| <b>COVID-19 severity</b>                                                  |                             |
| Mild symptoms - <i>n</i> (%)                                              | 29 (97%)                    |
| Hospitalized - <i>n</i> (%)                                               | 1 (3%)                      |
| <b>Vaccination received</b>                                               | BNT162b2                    |
| <b>Sampling time point - median weeks (IQR; range)</b>                    |                             |
| Early (after disease onset)                                               | 6.0 (4.7-7.0; 3.6-10)       |
| Late (after disease onset)                                                | 52.9 (51.4-56.8; 49.4-59.4) |
| Hybrid (after disease onset)                                              | 66.8 (65.3-68.4; 62.4-71.4) |
| <b>Time between infection and vaccination - median weeks (IQR; range)</b> | 60.9 (58.9-61.8; 52.4-66.1) |

**Supplementary Table 2. Serum neutralizing activity against Wu01 and Omicron.**

| Vaccinated cohort |                             |      |        |                                |      |       | Convalescent cohort |                             |      |        |                                |      |        |
|-------------------|-----------------------------|------|--------|--------------------------------|------|-------|---------------------|-----------------------------|------|--------|--------------------------------|------|--------|
| Study ID          | Wu01 Serum ID <sub>50</sub> |      |        | Omicron Serum ID <sub>50</sub> |      |       | Study ID            | Wu01 Serum ID <sub>50</sub> |      |        | Omicron Serum ID <sub>50</sub> |      |        |
|                   | Early                       | Late | Boost  | Early                          | Late | Boost |                     | Early                       | Late | Hybrid | Early                          | Late | Hybrid |
| Pt. #001          | 41                          | <10  | 5,079  | <10                            | <10  | 324   | R014                | 330                         | <10  | 5,178  | <10                            | <10  | 141    |
| Pt. #002          | 37                          | 14   | 2,537  | <10                            | <10  | 624   | R047                | 2,927                       | 566  | 8,932  | <10                            | <10  | 1,657  |
| Pt. #003          | 293                         | 28   | 2,545  | <10                            | <10  | 516   | R056                | 1,355                       | 88   | 4,137  | <10                            | <10  | 74     |
| Pt. #004          | 242                         | 75   | 1,849  | <10                            | <10  | 2,410 | R082                | 3,144                       | 108  | 7,948  | <10                            | <10  | 2,188  |
| Pt. #005          | 264                         | 41   | 7,706  | <10                            | <10  | 2,907 | R090                | 623                         | 119  | 8,650  | <10                            | <10  | 4,528  |
| Pt. #006          | 1,749                       | 339  | 11,807 | 12                             | <10  | 2,872 | R102                | 862                         | 90   | 27,730 | <10                            | <10  | 3,187  |
| Pt. #007          | 689                         | 231  | 6,149  | <10                            | 11   | 1,485 | R137                | 204                         | 141  | 8,581  | <10                            | <10  | 430    |
| Pt. #008          | 588                         | 267  | 9,734  | <10                            | <10  | 1,690 | R164                | 669                         | 70   | 5,818  | <10                            | <10  | 725    |
| Pt. #009          | 254                         | 115  | 2,948  | <10                            | <10  | 756   | R212                | 217                         | 80   | 5,347  | <10                            | <10  | 343    |
| Pt. #010          | 1,478                       | 467  | 22,912 | 28                             | <10  | 881   | R238                | 731                         | 140  | 14,687 | 87                             | 76   | 11,001 |
| Pt. #011          | 1,342                       | 372  | 22,833 | 33                             | 37   | 5,510 | R244                | 2,505                       | 119  | 24,552 | <10                            | <10  | 5,843  |
| Pt. #012          | 726                         | 94   | 6,211  | <10                            | <10  | 1,148 | R247                | 1,032                       | 142  | 13,058 | <10                            | 14   | 2,034  |
| Pt. #013          | 963                         | 430  | 6,909  | 35                             | 44   | 1,741 | R256                | 8,735                       | 397  | 23,738 | <10                            | 31   | 16,570 |
| Pt. #014          | 3,336                       | 817  | 11,718 | 114                            | 21   | 3,050 | R257                | 394                         | 353  | 9,332  | <10                            | 20   | 907    |
| Pt. #015          | 1,006                       | 165  | 5,567  | 15                             | <10  | 428   | R285                | 264                         | 75   | 3,450  | <10                            | <10  | 3,888  |
| Pt. #016          | 521                         | 101  | 10,154 | <10                            | <10  | 2,484 | R289                | 217                         | 153  | 7,964  | <10                            | <10  | 1,676  |
| Pt. #017          | 823                         | 54   | 3,077  | <10                            | <10  | 1,185 | R297                | 547                         | 89   | 30,227 | <10                            | <10  | 3,397  |
| Pt. #018          | 1,128                       | 265  | 8,731  | <10                            | 11   | 924   | R299                | 73                          | 30   | 5,709  | <10                            | <10  | 1,233  |
| Pt. #019          | 1,008                       | 239  | 6,461  | <10                            | <10  | 601   | R317                | 438                         | 133  | 9,163  | <10                            | <10  | 2,205  |
| Pt. #020          | 1,334                       | 225  | 6,269  | <10                            | 14   | 450   | R399                | 76                          | 26   | 2,338  | <10                            | <10  | 474    |
| Pt. #021          | 695                         | 535  | 11,128 | <10                            | 36   | 2,645 | R401                | 59                          | 38   | 4,610  | <10                            | <10  | 1,278  |
| Pt. #022          | 1,600                       | 326  | 19,819 | 49                             | 134  | 7,851 | R434                | 473                         | 137  | 5,264  | <10                            | <10  | 430    |
| Pt. #023          | 294                         | 227  | 7,643  | <10                            | <10  | 868   | R440                | 1,250                       | 381  | 21,847 | <10                            | 11   | 1,375  |
| Pt. #024          | 311                         | 98   | 11,463 | 23                             | 53   | 3,514 | R458                | 171                         | 14   | 2,553  | <10                            | <10  | 874    |
| Pt. #025          | 474                         | 160  | 3,768  | <10                            | <10  | 1,312 | R484*               | 971                         | 289  | 15,642 | 17                             | 34   | 8,297  |
| Pt. #026          | 551                         | 327  | 6,078  | <10                            | <10  | 1,571 | R491                | 421                         | 99   | 7,680  | <10                            | 17   | 806    |
| Pt. #027          | 831                         | 112  | 6,317  | 10                             | <10  | 625   | R527                | 37                          | 18   | 2,979  | <10                            | <10  | 400    |
| Pt. #028          | 408                         | 118  | 7,307  | <10                            | 23   | 1,454 | R715                | 91                          | 55   | 6,999  | <10                            | <10  | 2,381  |
| Pt. #029          | 270                         | 93   | 3,676  | <10                            | 21   | 2,239 | R749                | 11,008                      | 95   | 4,579  | 79                             | 31   | 8,028  |
| Pt. #030          | 352                         | 68   | 609    | <10                            | <10  | 21    | R849                | 219                         | 160  | 7,640  | <10                            | 11   | 4,546  |

Serum ID<sub>50</sub> >2,500 250-2,500 50-250 10-50 <10

\* Participant R484 received two BNT162b2 vaccinations three weeks apart.
